# Supplementary material
Source: Research Square preprint supplement (doi:10.21203/rs.3.rs-9469690/v1)
Supplement: Supplementary file 1 [file c243d0cf9f3ac6397c099323.docx]

Covalent Targeting of ACTN4 Disrupts Cytoskeletal Control of TfR1 Recycling and Drives Ferroptosis in Acute Myeloid Leukemia

Zhigang Chen a, c, e, 1, Weiyao Liao b, 1, Qianwei Lu d, Jiawei Chen a, Zengsheng Yin f, Jianhui Rong b, Congcong Wang c, Yutong Xie c, Chenmo Li c, MingYang Gao c, Lin Li a, Jinhu Li a, Xinyan Dai a, Li Li a, Lei Gao c, *, Jia Zhao b, *, Hongyi Qi a, *

*a College of Pharmaceutical Sciences & College of Chinese Medicine, Southwest University, Chongqing 400715, China*

*b School of Chinese MedicineLi Ka Shing Faculty of MedicineThe University of Hong Kong 3 Sassoon Road, Pokfulam, Hong Kong 999077, P. R. China*

*c Medical Center of Hematology, Xinqiao Hospital, State Key Laboratory of Trauma, Burn and Combined Injury, Army Medical University, Chongqing, 400037, China*

*d Radiotherapy Department, Chongqing Ninth People's Hospital, Chongqing, China Equal contribution*

*e Chongqing Institute of Advanced Pathology, Jinfeng Laboratory, Chongqing 400039, China*

*f Department of Chemistry, and State Key Laboratory of Synthetic Chemistry, The University of Hong Kong, Pokfulam Road, HongKong, P.R. China*

⁎ Corresponding author : Hongyi Qi, Jia Zhao, Lei Gao

*E-mail addresses: hongyiqi@swu.edu.cn (Hongyi Qi), zhaojia7@hku.hk (Jia Zhao), gaolei7765@tmmu.edu. cn (Lei Gao)*

**Supplementary Methods**

**- Table S1**

**- Figure S1**

**- Figure S2**

**- Figure S3**

**- Figure S4**

**- Figure S5**

**- Figure S6**

**- Figure S7**

**- Figure S8**

**- Figure S9**

**Materials and Methods**

**Reagents**

Pseudolaric acid B (PAB; purity >98%) was purchased from Nanjing Chunqiu Biotechnology Co., Ltd. (Nanjing, China). Antibodies against 4-HNE, PRDX3, ACSL4, TfR1, FTL, FPN1, and GPX4, as well as HRP-conjugated anti-mouse and anti-rabbit secondary antibodies, were obtained from Proteintech Group Co., Ltd. (Wuhan, China). Fluorochrome-conjugated anti-CD45 and anti-TfR1 antibodies were sourced from Thermo Fisher Scientific Inc. (Waltham, MA, USA). Expression plasmids were purchased from Sangon Biotech Co., Ltd. (Shanghai, China). The Malondialdehyde (MDA) Assay Kit and Cell Counting Kit-8 (CCK-8) were obtained from Beyotime Biotechnology Co., Ltd. (Shanghai, China). RhoNox-1, DCFH-DA, C11-BODIPY 581/591, ferrostatin-1, deferoxamine (DFO), and Z-VAD-FMK were procured from Sigma-Aldrich Co. LLC (St. Louis, MO, USA). D-Luciferin potassium salt was purchased from Yuanye Bio-Technology Co., Ltd. (Shanghai, China).

**Table S1**.

TFR1 Transient Knockdown Plasmid Sequence.

| Name | Sequence(5'-3') | |
| --- | --- | --- |
| H7037-siTFR1-1 | sense | CCGUGCUACUUCCAGACUA(dT)(dT) |
| antisense | UAGUCUGGAAGUAGCACGG(dT)(dT) |
| H7037-siTFR1-2 | sense | CGGUCAUCAGGAUUGCCUA(dT)(dT) |
| antisense | UAGGCAAUCCUGAUGACCG(dT)(dT) |
| H7037-siTFR1-3 | sense | GGAUUCCUGAGUUGAACAA(dT)(dT) |
| antisense | UUGUUCAACUCAGGAAUCC(dT)(dT) |


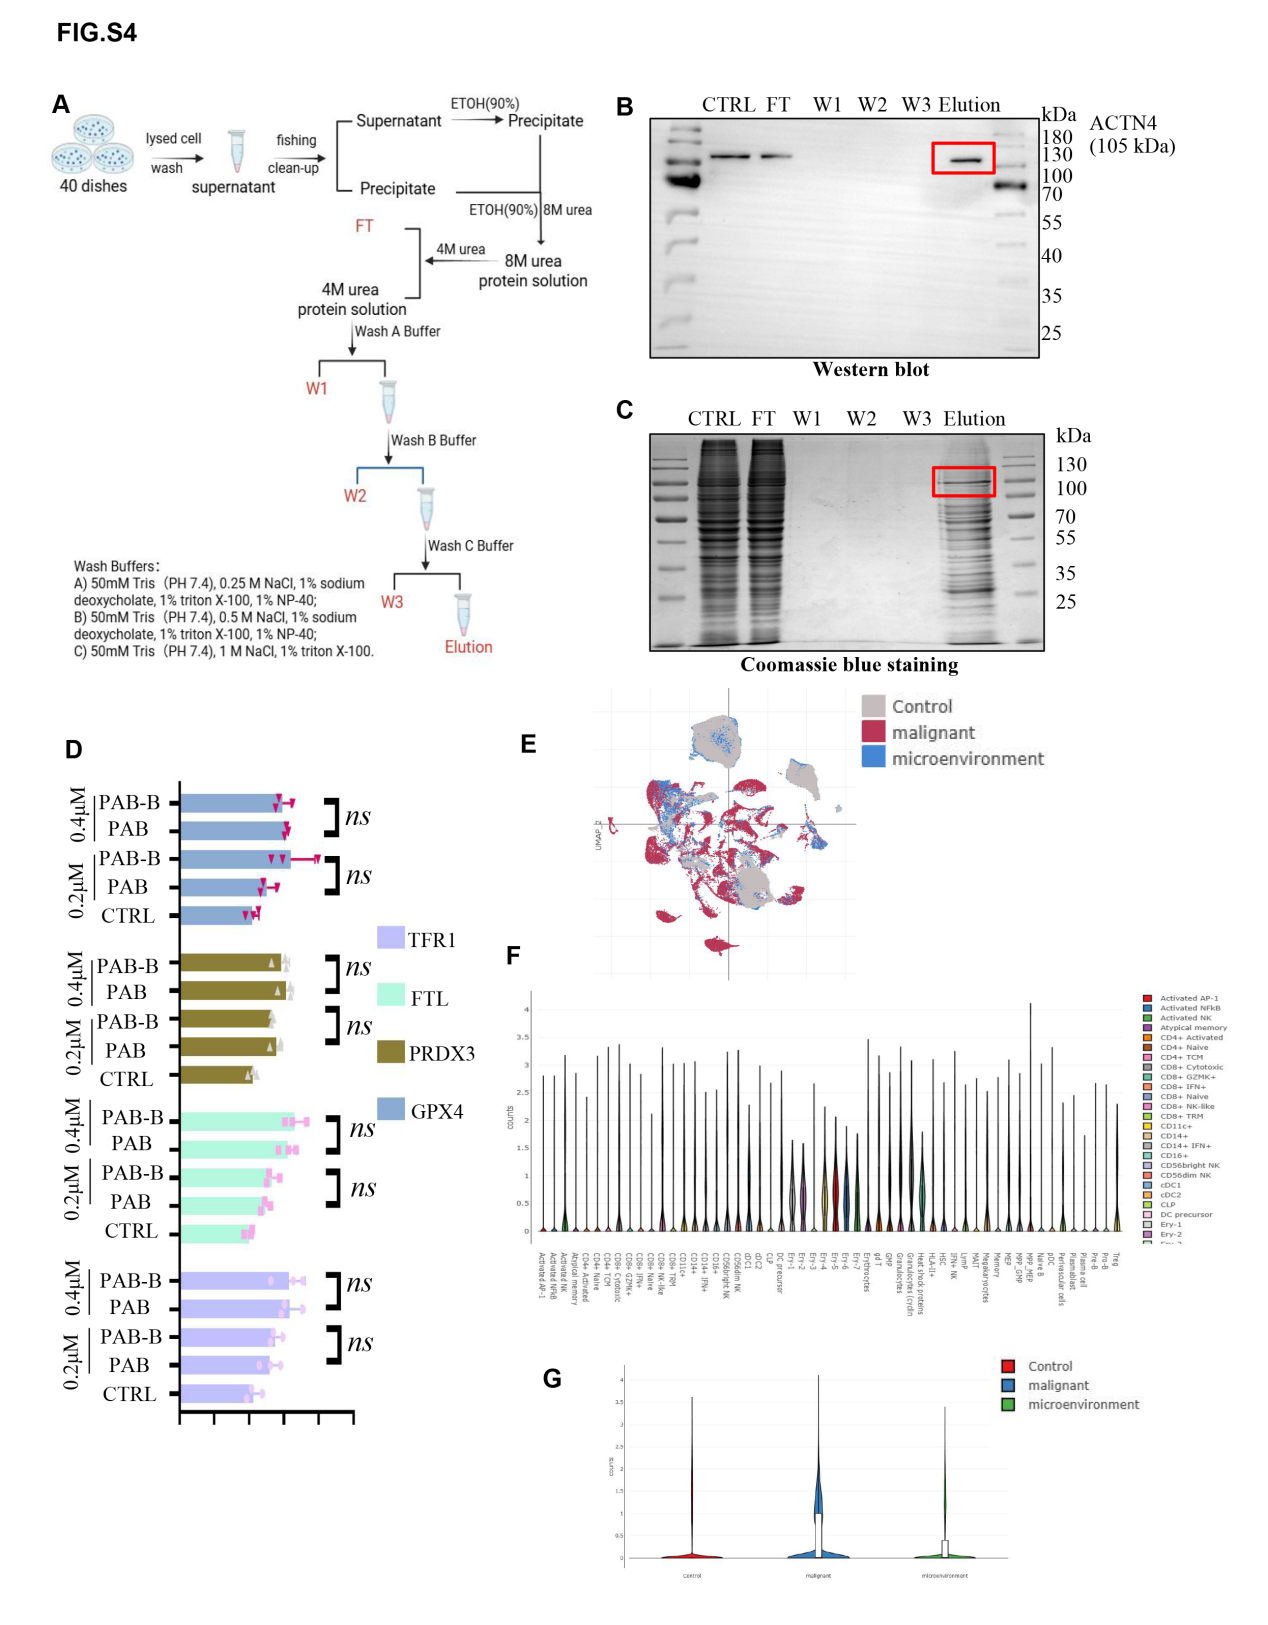


**Figure S1:Identification and validation of PAB target proteins and ACTN4 expression in AML bone marrow tissues.** (A) Schematic diagram of the target fishing workflow. The lysed cells were washed and the supernatant was collected. The supernatant was subjected to a fishing process followed by clean-up. The precipitate was treated with 90% ethanol and 8M urea protein solution. The precipitate was then washed with different buffers (Wash A, B, and C) and eluted with 4M urea protein solution. (B) Western blot analysis of ACTN4 protein levels after target fishing. The results show that ACTN4 was specifically enriched in the elution fraction (W3 Elution) compared to the control (CTRL), flow-through (FT), and wash fractions (W1, W2, and W3). The molecular weight of ACTN4 is approximately 105 kDa. (C) Coomassie blue staining of the elution fraction after target fishing. (D) Consistency evaluation of PAB and PAB-Biotin. The results show that PAB and PAB-Biotin have similar effects on the expression of various proteins, including TFR1, FTL, PRDX3, and GPX4.(E) Single-cell sequencing analysis of AML bone marrow tissues from the NCBI database. The results show the distribution of malignant cells (red), microenvironment cells (blue), and control cells (gray) in the AML bone marrow tissues. (F) Expression levels of ACTN4 in various cell types in AML bone marrow tissues from the NCBI database. (G) Expression levels of ACTN4 in normal cells, malignant cells, and microenvironment cells in AML bone marrow tissues from the NCBI database. The results show that ACTN4 is highly expressed in malignant cells and microenvironment cells compared to normal cells. All experiments were independently repeated three times with consistent results. Values are presented as the means ± SD (n=3 per group). **P* <0.05, ** *P* <0.01, and *** *P* <0.001 vs CTRL.


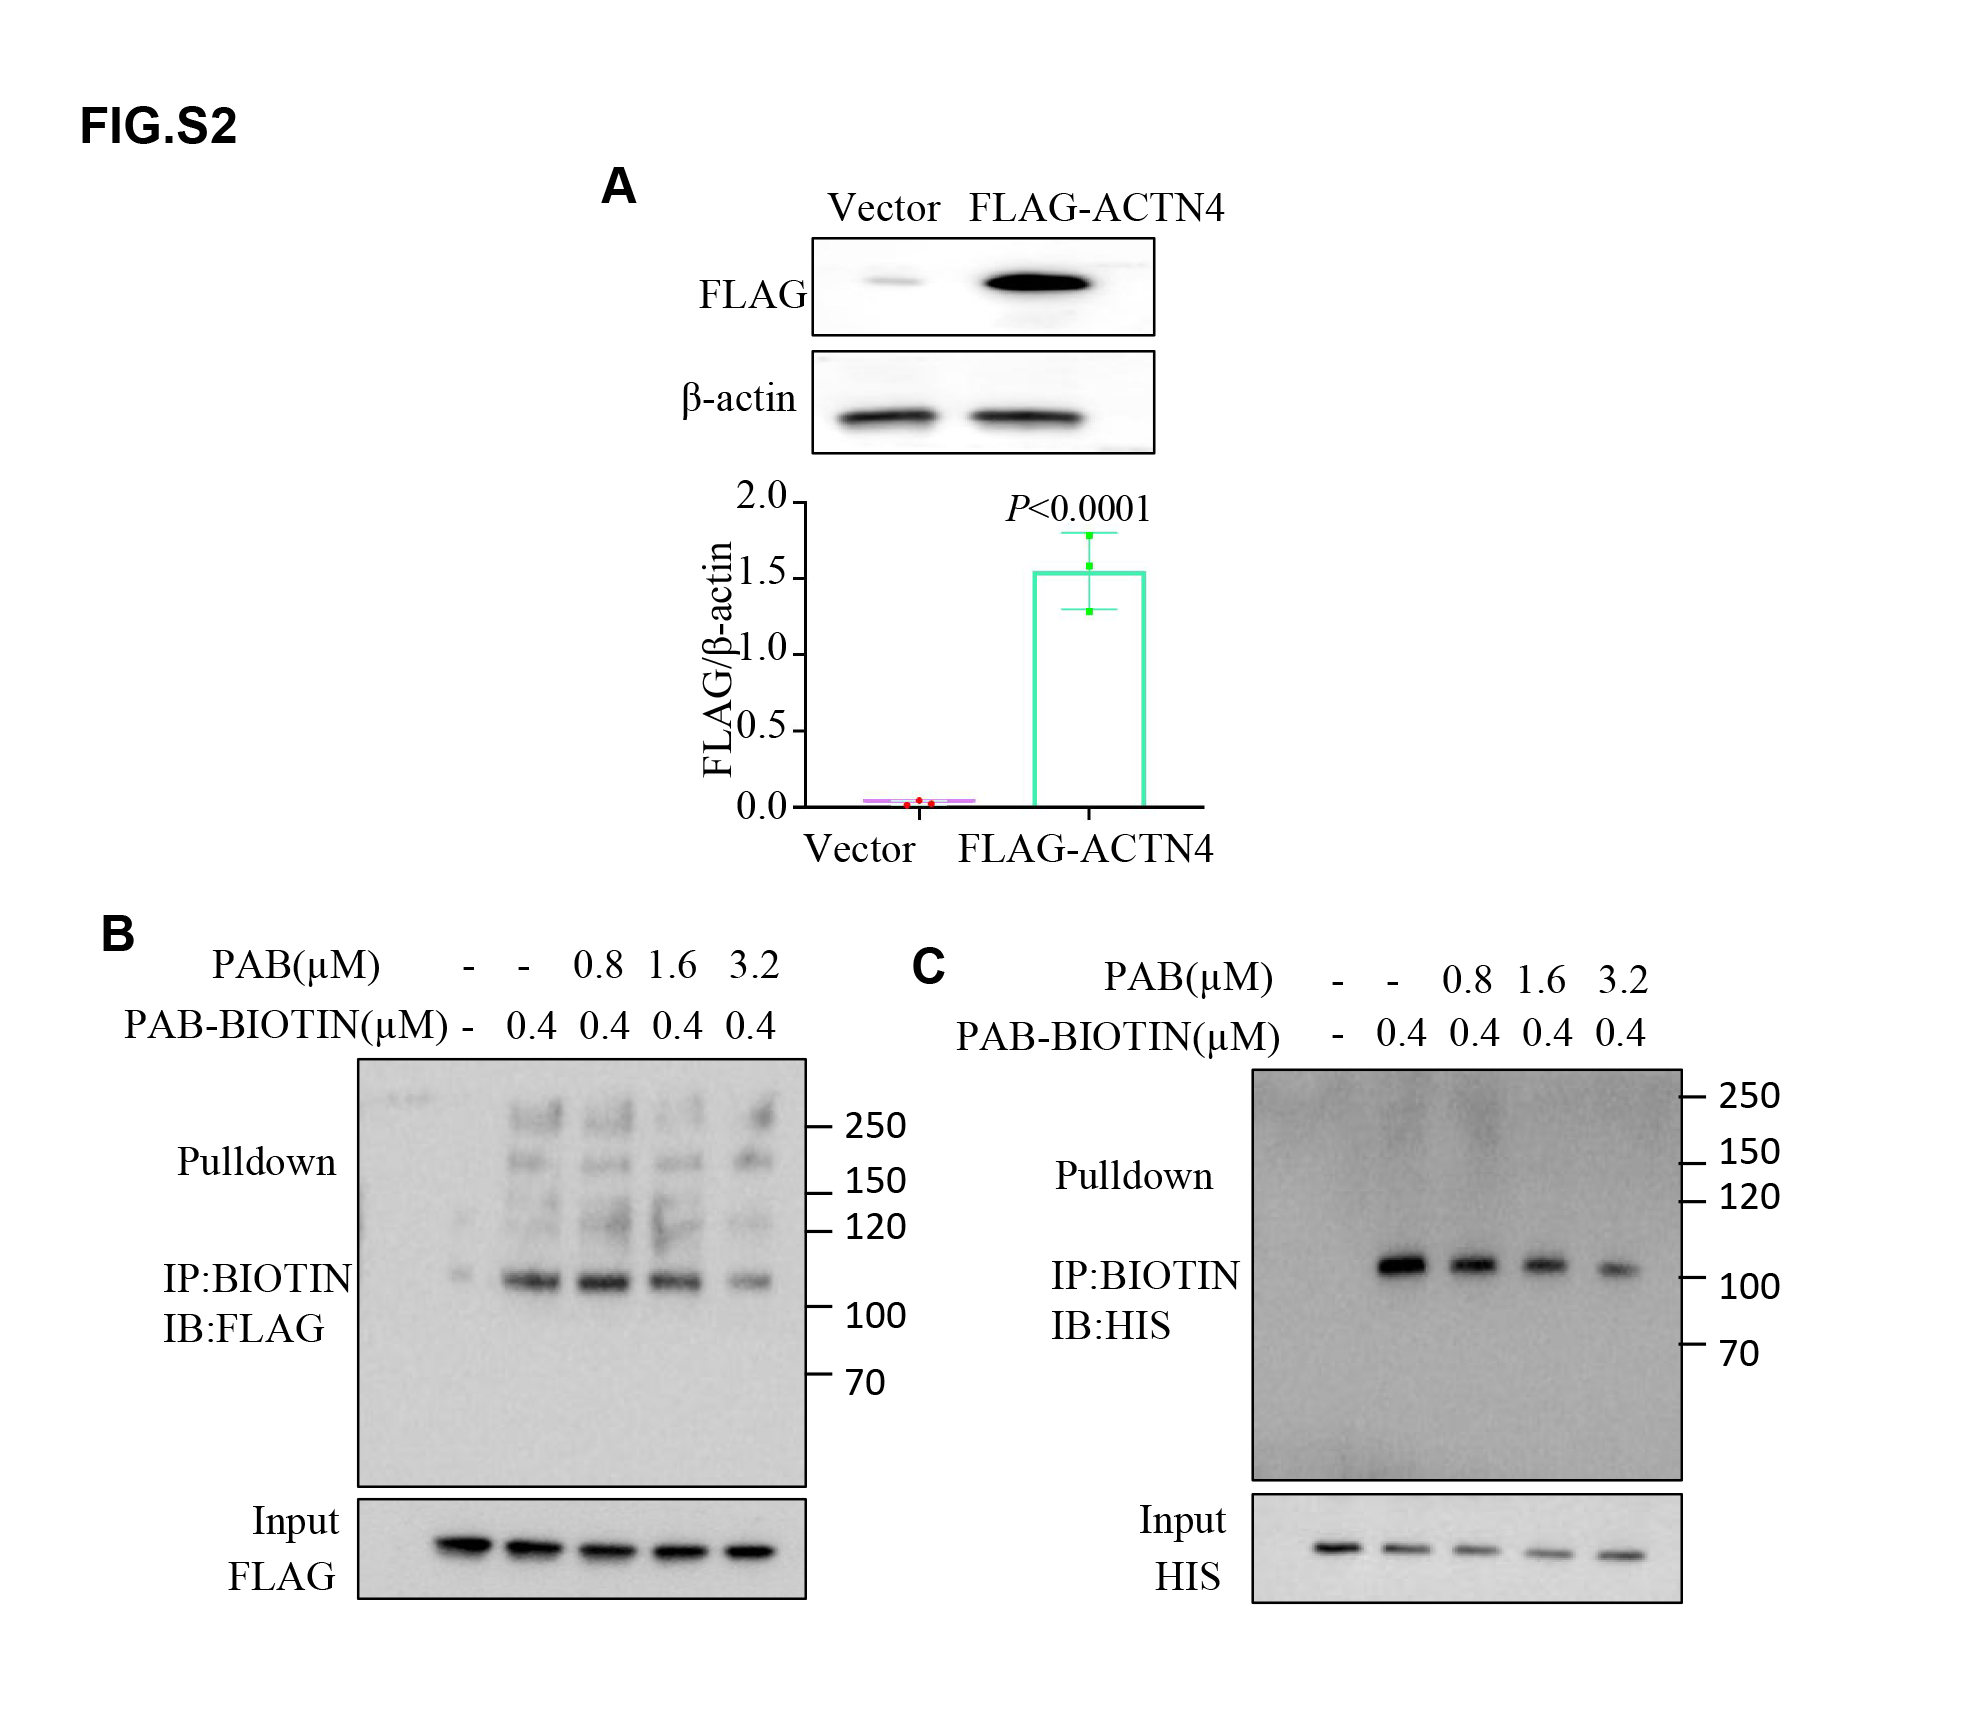


**Figure S2. Validation of PAB–ACTN4 interaction in cellular and in vitro systems.** (A) Western blot analysis confirming the overexpression of FLAG-tagged ACTN4 in transfected cells. Quantification of FLAG/β-actin is shown below. Data are presented as mean ± SD (n = 3). (B) Pull-down assay in cells transfected with FLAG-ACTN4. PAB-biotin (0.4 μM) efficiently enriched FLAG-tagged ACTN4, and this interaction was competitively reduced by increasing concentrations of free PAB (0.8–3.2 μM). (C) In vitro pull-down assay using recombinant HIS-ACTN4 protein. PAB-biotin specifically bound to HIS-ACTN4, and the binding was attenuated in a concentration-dependent manner by free PAB.

**
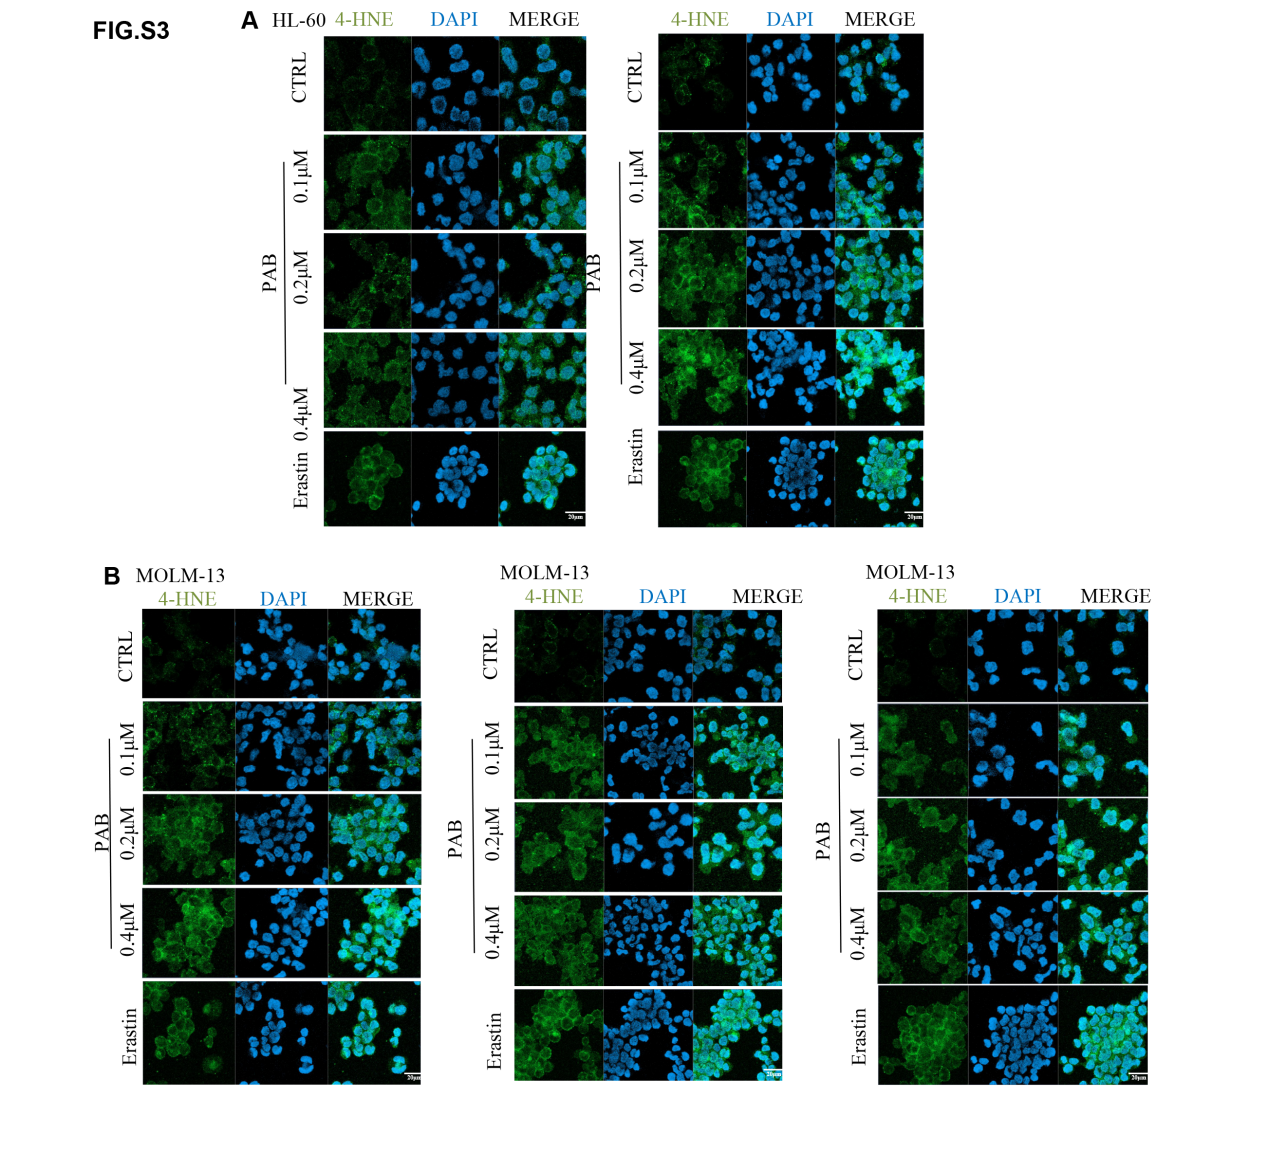
**

**Figure S3. 4-HNE immunofluorescence staining in HL-60 and MOLM-13 cells treated with PAB and Erastin.** (A) HL-60 cells were treated with different concentrations of PAB (0.1 μM, 0.2 μM, and 0.4 μM) and Erastin (0.1 μM, 0.2 μM, and 0.4 μM). 4-HNE immunofluorescence staining was performed to assess the accumulation of 4-HNE. The control group (CTRL) showed minimal 4-HNE staining (green fluorescence）. Treatment with PAB and Erastin resulted in a concentration-dependent increase in 4-HNE staining, with the highest concentration (0.4 μM) showing the most significant accumulation. DAPI staining (blue fluorescence) was used to visualize the nuclei. (B) The control group (CTRL) exhibited minimal 4-HNE staining, similar to HL-60 cells. Treatment with PAB and Erastin also led to a concentration-dependent increase in 4-HNE staining. Scale bar: 20 μm. Values are presented as the means ± SD (n=3 per group). **P* <0.05, ** *P* <0.01, and *** *P* <0.001 vs CTRL.

**
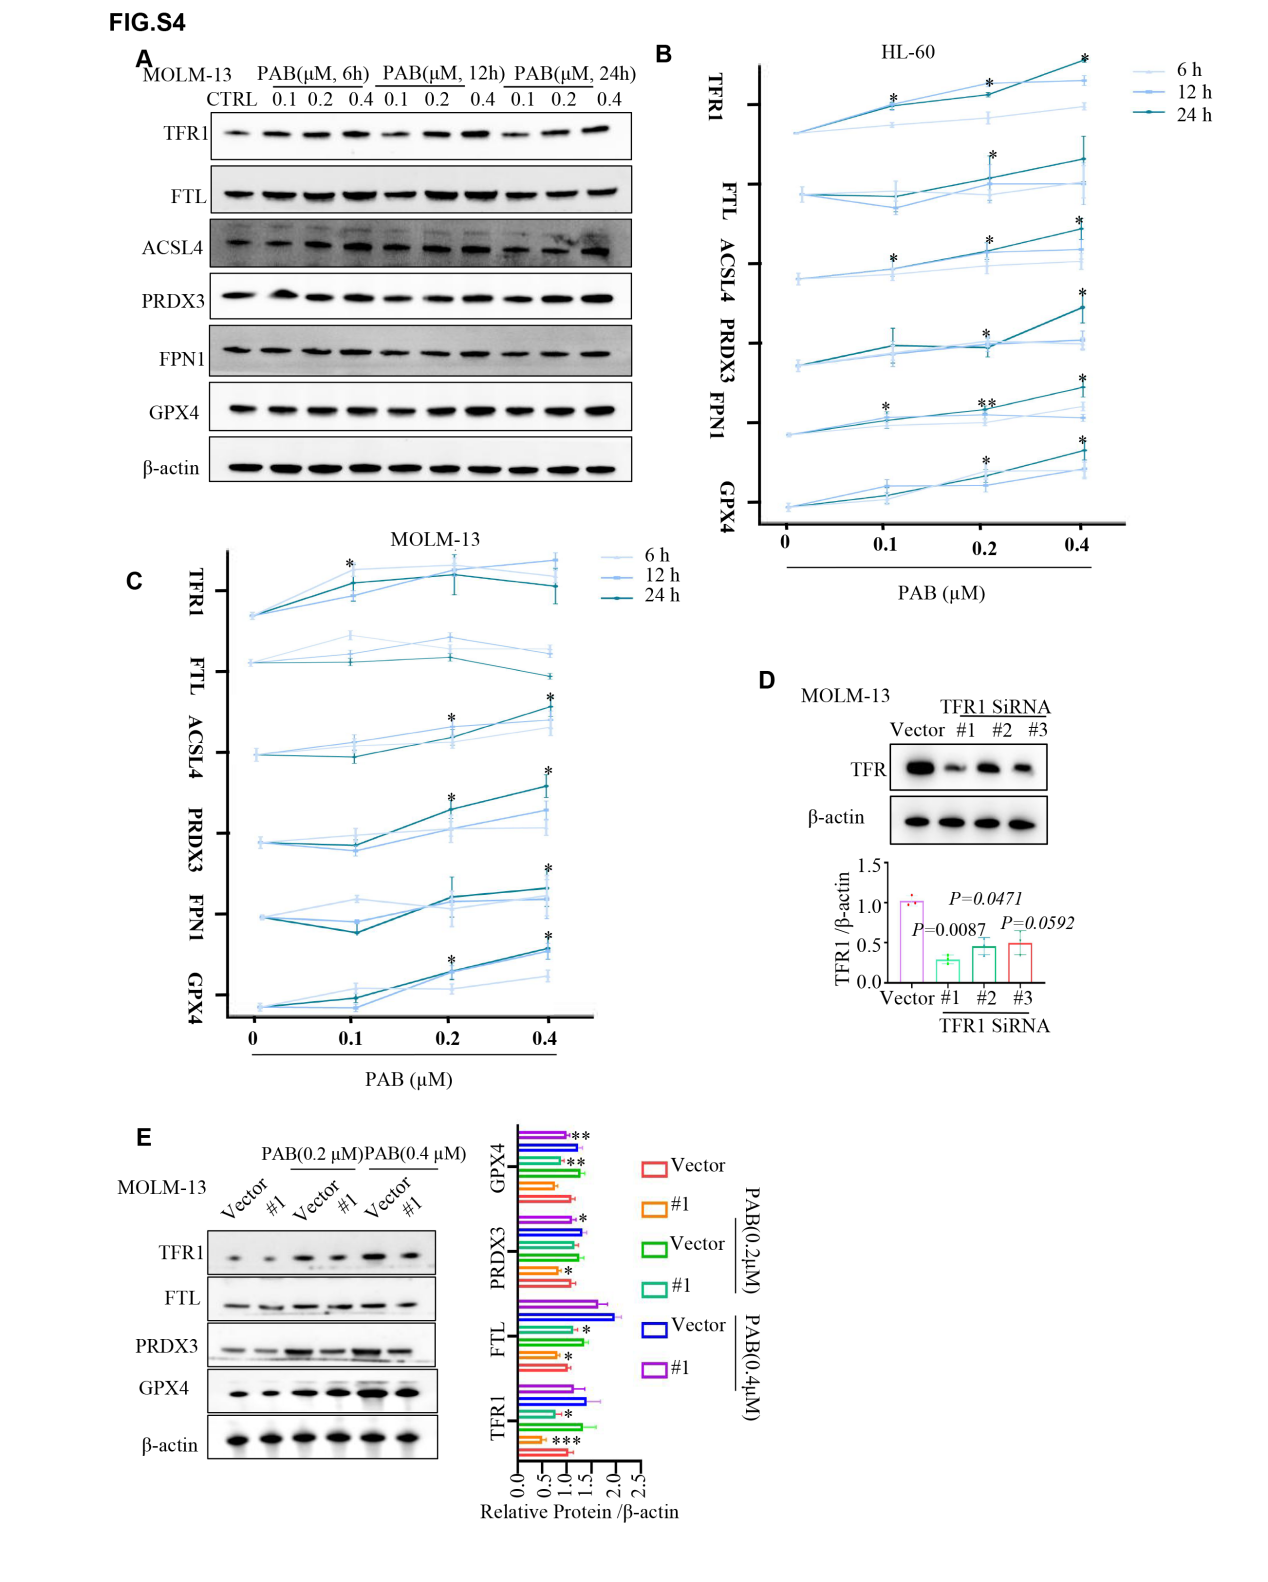
**

**Figure S4. Effects of PAB treatment on protein expression in HL-60 and MOLM-13 cells and the role of TFR1 in PAB-induced responses.** (A-B) Western blot analysis of TFR1, FTL, ACSL4, PRDX3, FPN1, and GPX4 protein levels in AML cells treated with different concentrations of PAB (0.1, 0.2, and 0.4 μM) for 6, 12, and 24 hours. The results from three independent Western blot experiments are presented in the form of a line graph. (C) Western blot analysis of TFR1, FTL, ACSL4, PRDX3, FPN1, and GPX4 in MOLM-13 cells treated with 0.1, 0.2, and 0.4 μM PAB for 6, 12, and 24 hours. (D) Western blot analysis of TFR1 expression in MOLM-13 cells transfected with TFR1 siRNA or a control vector. The results show that TFR1 siRNA effectively knocked down TFR1 expression compared to the vector control. (E) Western blot analysis of TFR1, FTL, PRDX3, and GPX4 in MOLM-13 cells transfected with TFR1 siRNA or a control vector and treated with 0.2 or 0.4 μM PAB for 24 hours. Values are presented as the means ± SD (n=3 per group). **P* <0.05, ** *P* <0.01, and *** *P* <0.001 vs CTRL.


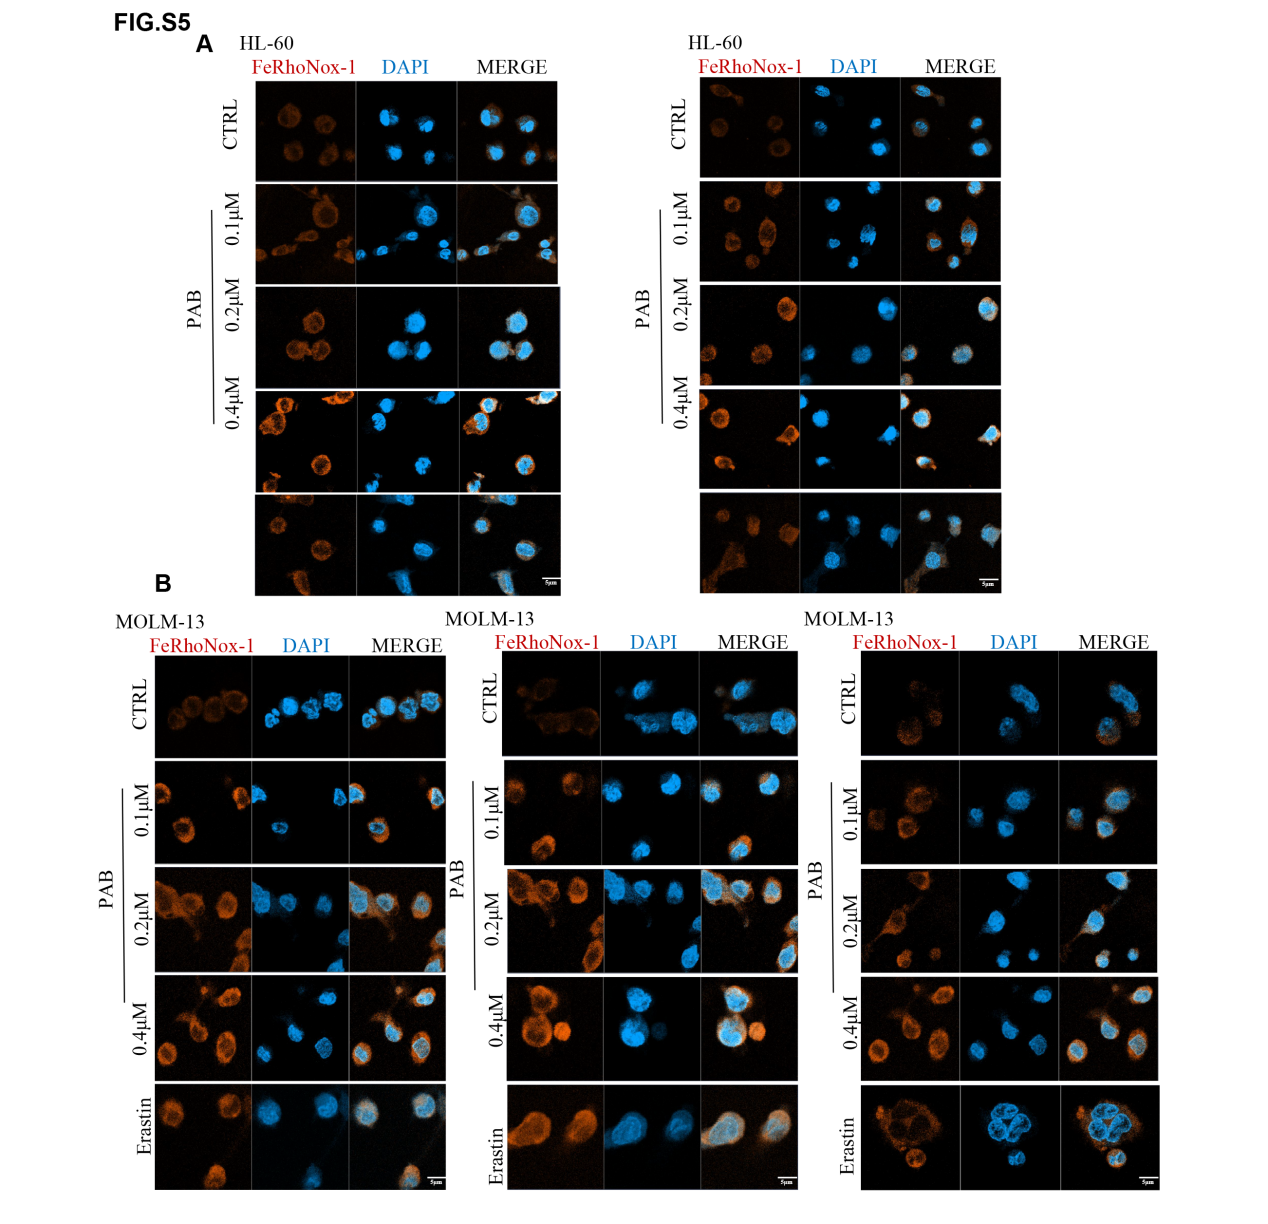


**Figure S5:Intracellular iron ion levels in HL-60 and MOLM-13 cells treated with PAB and Er**astin as detected by FeRhoNox-1. (A-B) AML cells were treated with different concentrations of PAB (0.1 μM, 0.2 μM, and 0.4 μM) and Erastin ( 0.5 μM). Intracellular iron ion levels were assessed using the iron ion probe FeRhoNox-1. Scale bar: 5 μm.


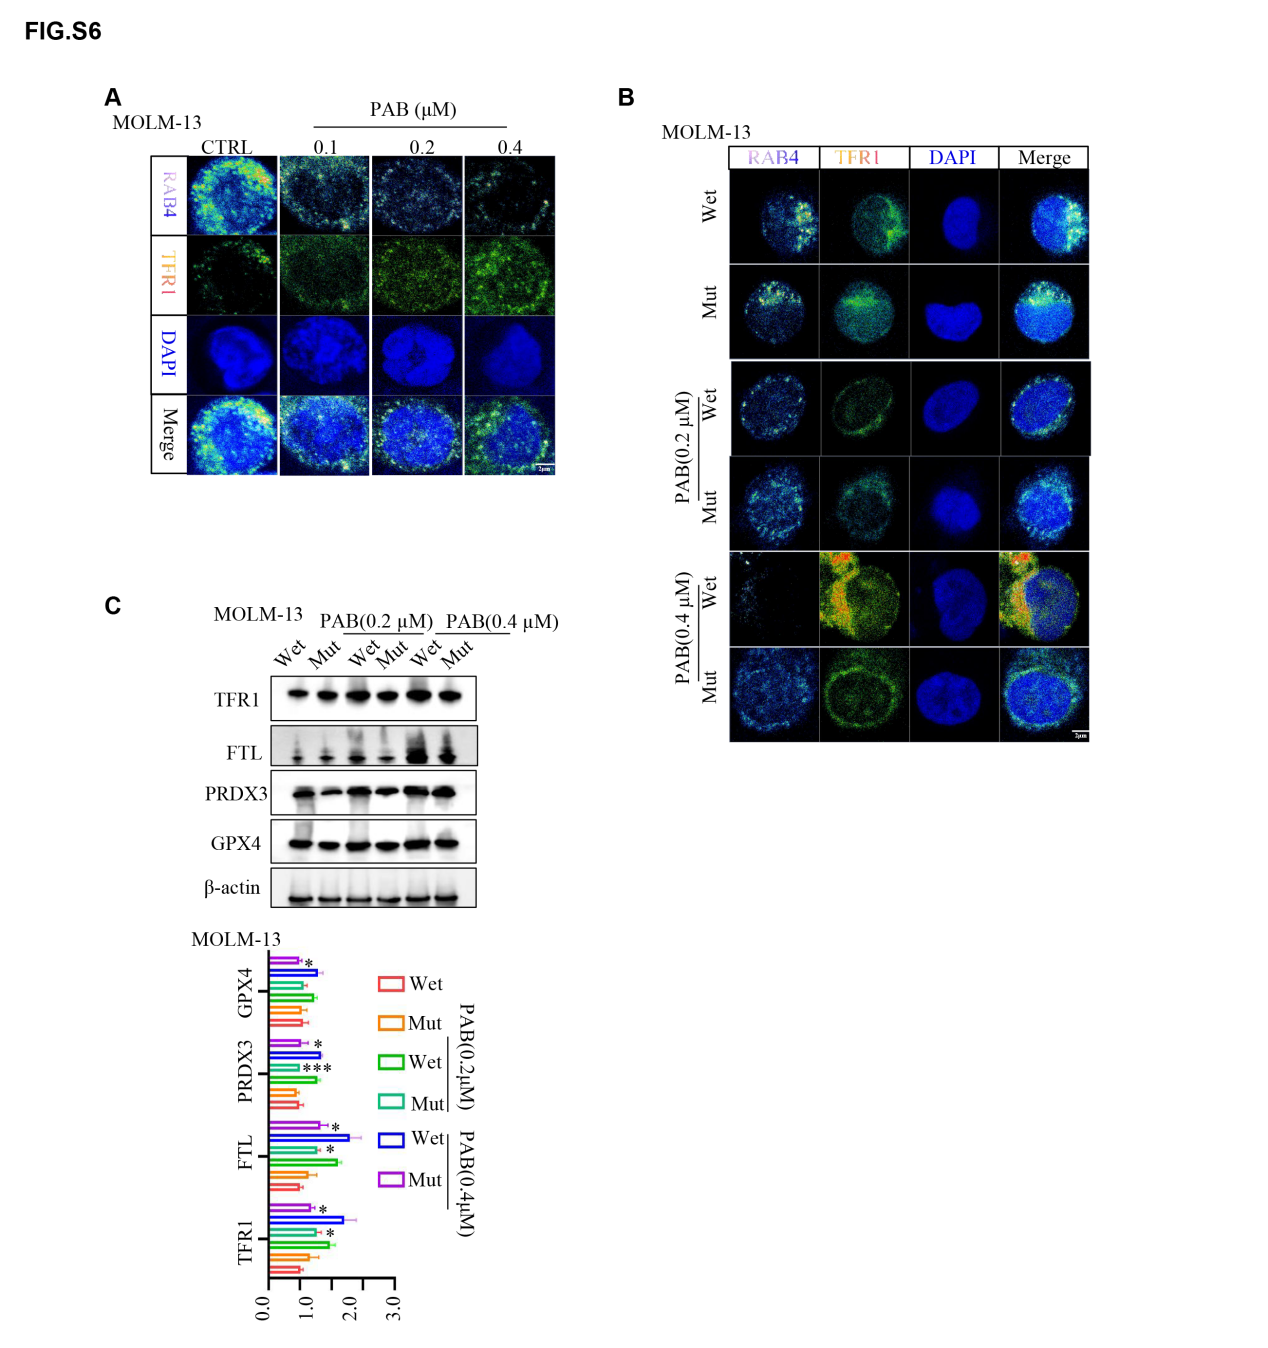


**Figure S6: Effects of PAB treatment on RAB4 and TFR1 colocalization and iron metabolism-related protein expression in MOLM-13 cells.** (A) Laser confocal microscopy images of RAB4 and TFR1 double staining in MOLM-13 cells treated with different concentrations of PAB (0.1 μM, 0.2 μM, and 0.4 μM). (B) Laser confocal microscopy images of RAB4 and TFR1 double staining in wild-type MOLM-13 cells and MOLM-13 cells with ACTN4 protein 273 lysine mutation (Mut) treated with PAB (0.2 μM and 0.4 μM). (C) Western blot analysis of iron metabolism-related proteins (TFR1, FTL, PRDX3, and GPX4) in wild-type MOLM-13 cells and MOLM-13 cells with ACTN4 protein 273 lysine mutation treated with PAB (0.2 μM and 0.4 μM). Values are presented as the means ± SD. *P <0.05, ** P <0.01, and *** P <0.001 vs CTRL.


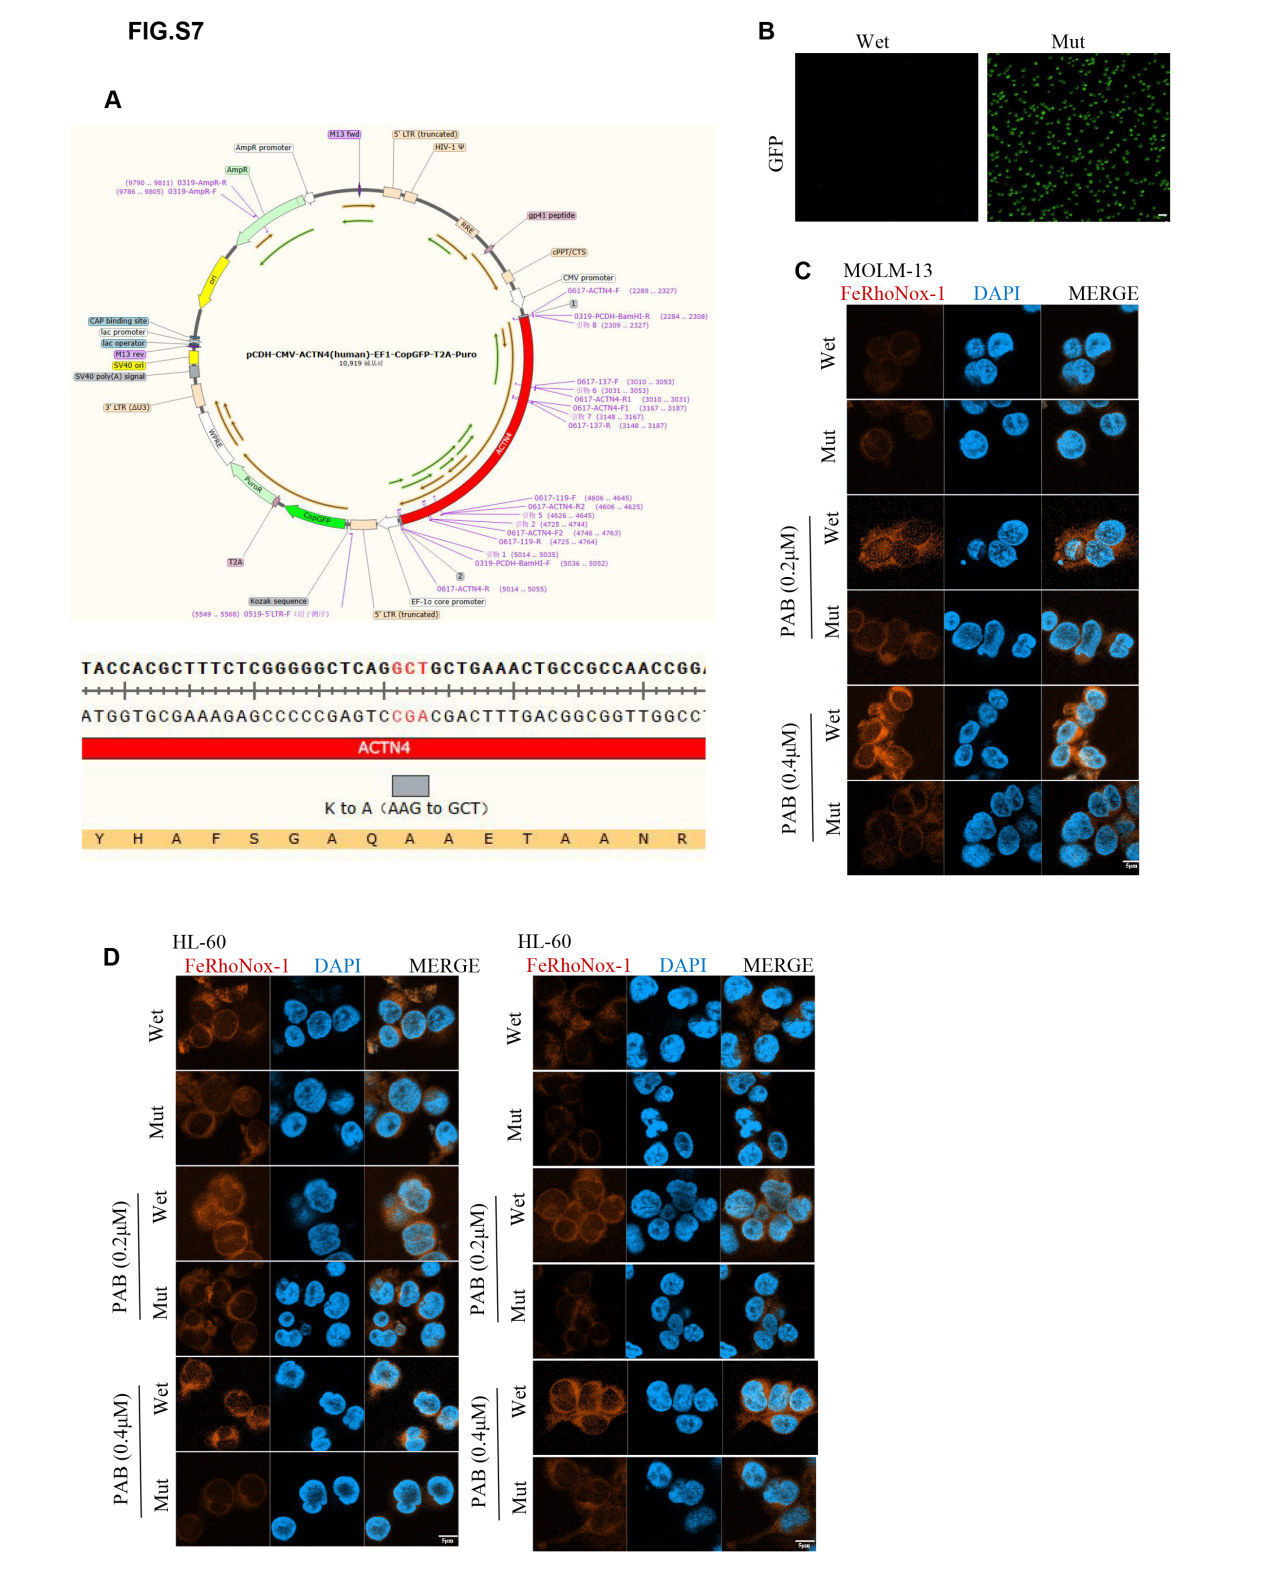


**Figure S7: Effects of ACTN4 protein 273 lysine point mutation on PAB-induced changes in intracellular iron ion levels.** (A) Schematic diagram of the ACTN4 protein 273 lysine point mutation plasmid. The diagram shows the structure of the plasmid, including the promoter, coding sequence, and other regulatory elements. The specific mutation site (K273A) is highlighted, indicating the substitution of lysine (K) with alanine (A) at the 273rd position of the ACTN4 protein. (B) GFP fluorescence images of wild-type MOLM-13 cells and MOLM-13 cells transduced with lentivirus expressing the ACTN4 protein 273 lysine point mutation (Mut). The results show that the lentivirus successfully transduced the mutant ACTN4 protein into MOLM-13 cells, as indicated by the GFP fluorescence. (C) Intracellular iron ion levels in wild-type MOLM-13 cells and MOLM-13 cells with ACTN4 protein 273 lysine mutation treated with PAB (0.2 μM and 0.4 μM). Intracellular iron ion levels were assessed using the iron ion probe FeRhoNox-1. (D) Intracellular iron ion levels in wild-type HL-60 cells and HL-60 cells with ACTN4 protein 273 lysine mutation treated with PAB (0.2 μM and 0.4 μM). Scale bar: 5 μm.


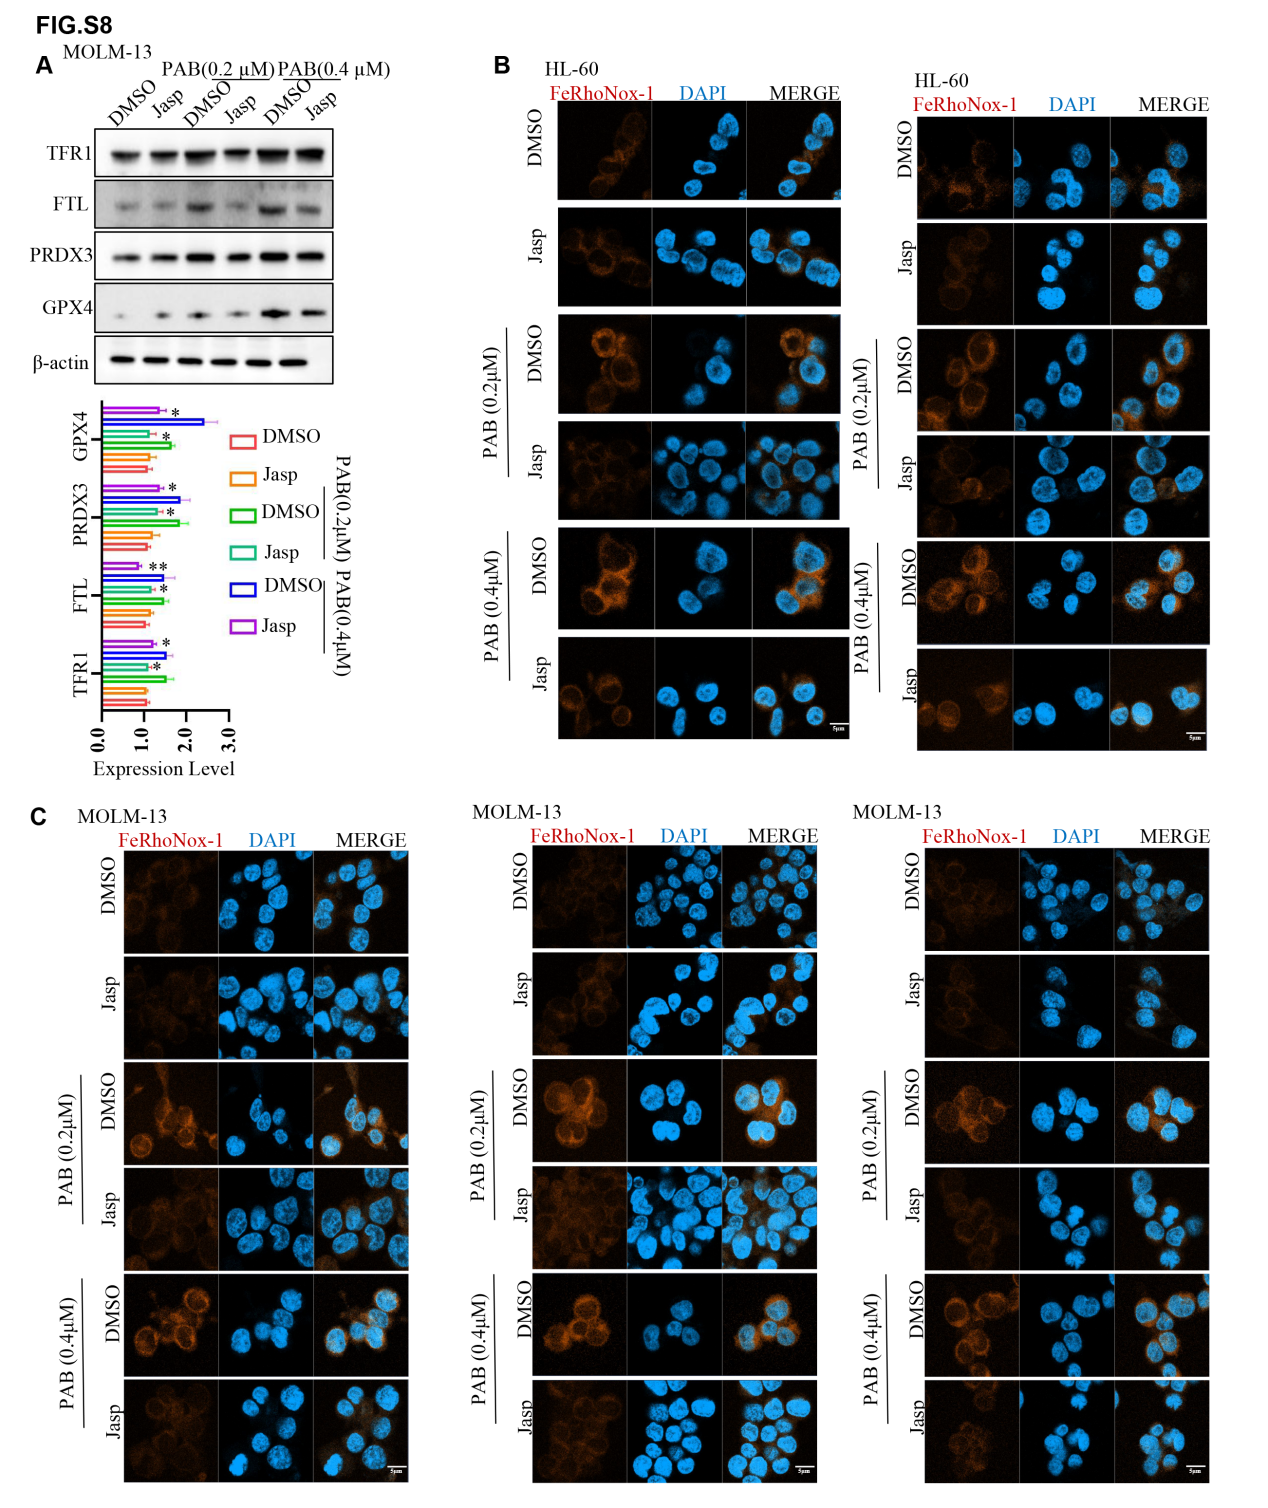


**Figure S8:Effects of Jasplakinolide pretreatment on PAB-induced changes in iron metabolism-related proteins and intracellular iron ion levels in MOLM-13 and HL-60 cells.** (A) Western blot analysis of iron metabolism-related proteins (TFR1, FTL, PRDX3, and GPX4) in MOLM-13 cells pretreated with Jasplakinolide (Jasp) and then treated with PAB (0.2 μM and 0.4 μM). (B) Intracellular iron ion levels in HL-60 cells pretreated with Jasplakinolide and then treated with PAB (0.2 μM and 0.4 μM). Intracellular iron ion levels were assessed using the iron ion probe FeRhoNox-1. (C) Intracellular iron ion levels in MOLM-13 cells pretreated with Jasplakinolide and then treated with PAB (0.2 μM and 0.4 μM). Scale bar: 5 μm. Values are presented as the means ± SD. *P <0.05, ** P <0.01, and *** P <0.001 vs CTRL.


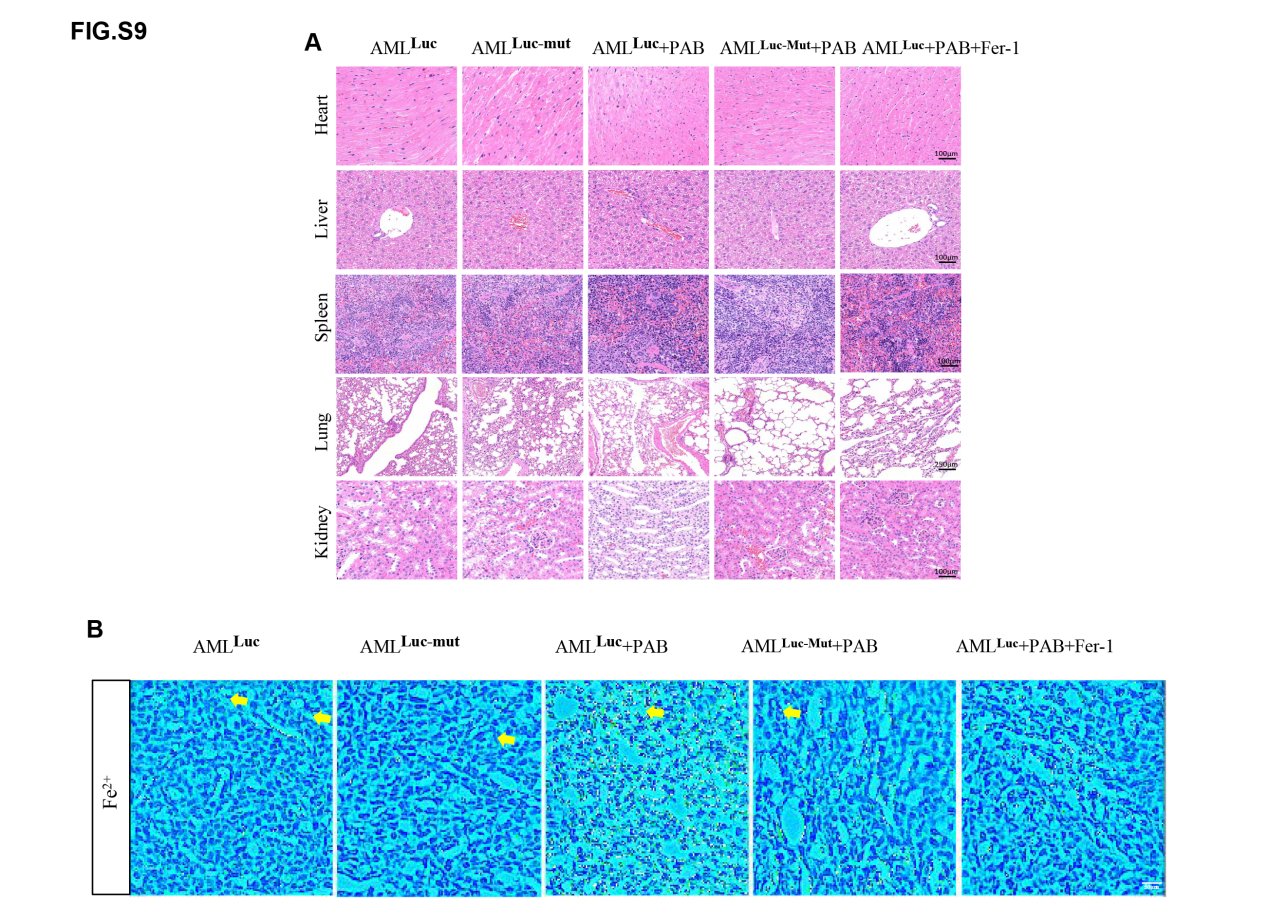


**Figure S9: Histological analysis of different organs in AMLLuc, AMLLUC+Mut, AMLLuc+PAB, AMLLUC+Mut+PAB and AMLLuc+PAB+Fer-1 groups.** (A) Histological sections of various organs, including the heart, liver, spleen, lung, and kidney, were stained with hematoxylin and eosin (H&E) to evaluate the tissue morphology and potential pathological changes in the AMLLuc, AMLLUC+Mut, AMLLuc+PAB, AMLLUC+Mut+PAB and AMLLuc+PAB+Fer-1 groups.The scale bar is 100 μm. (B) Iron oxide staining in AML tumor sections.
